# Supplementary material
Source: Springer Nature journal article supplement (https://www.springermedizin.de/resource/supplementary/12874_2011_816_MOESM1_ESM.pdf/9432934)

Assuming binormality (unequal variances)

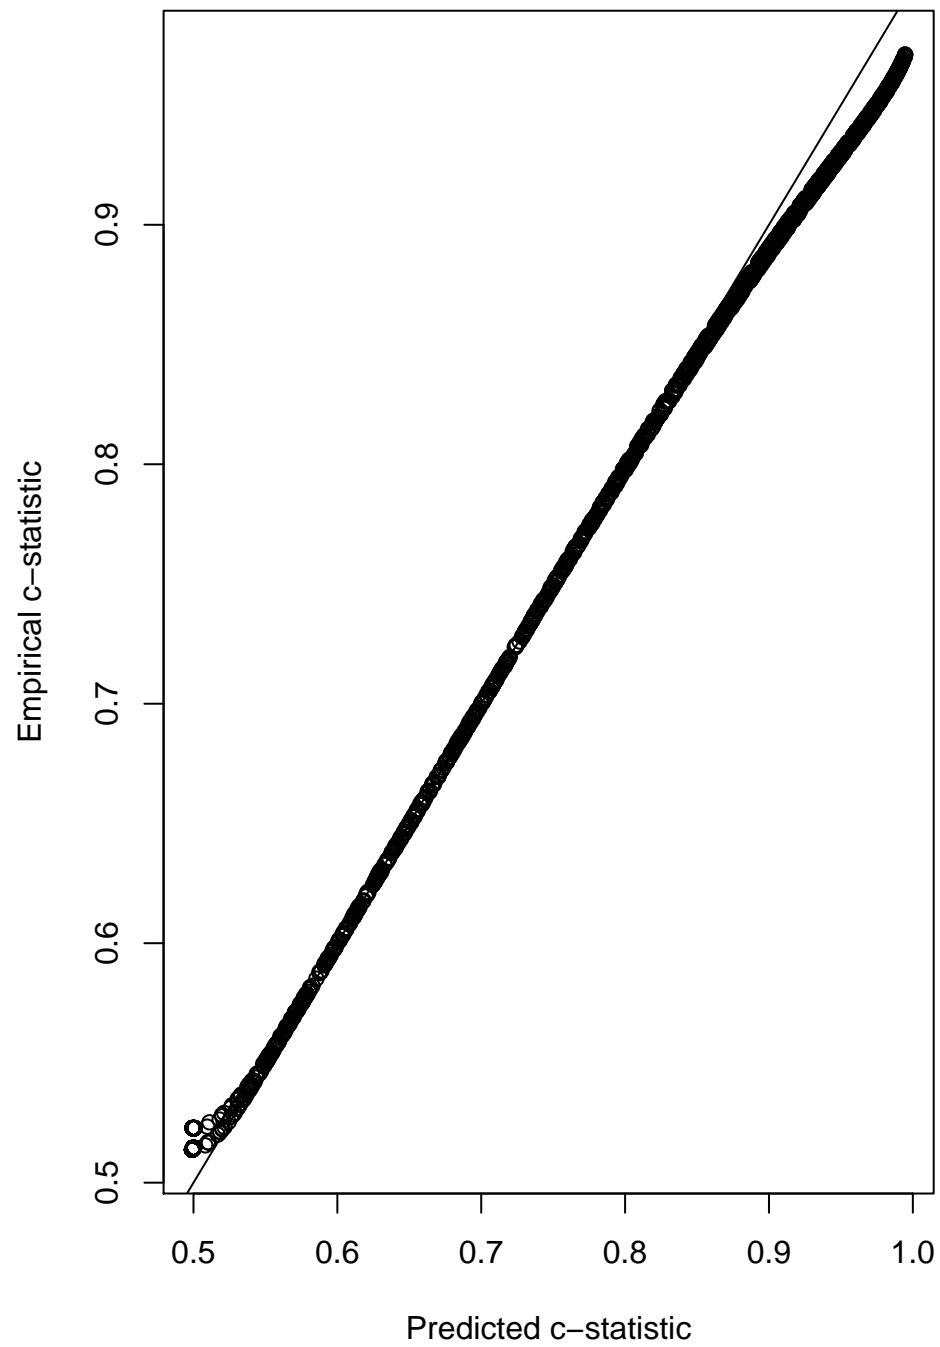

Assuming binormality (equal variances)

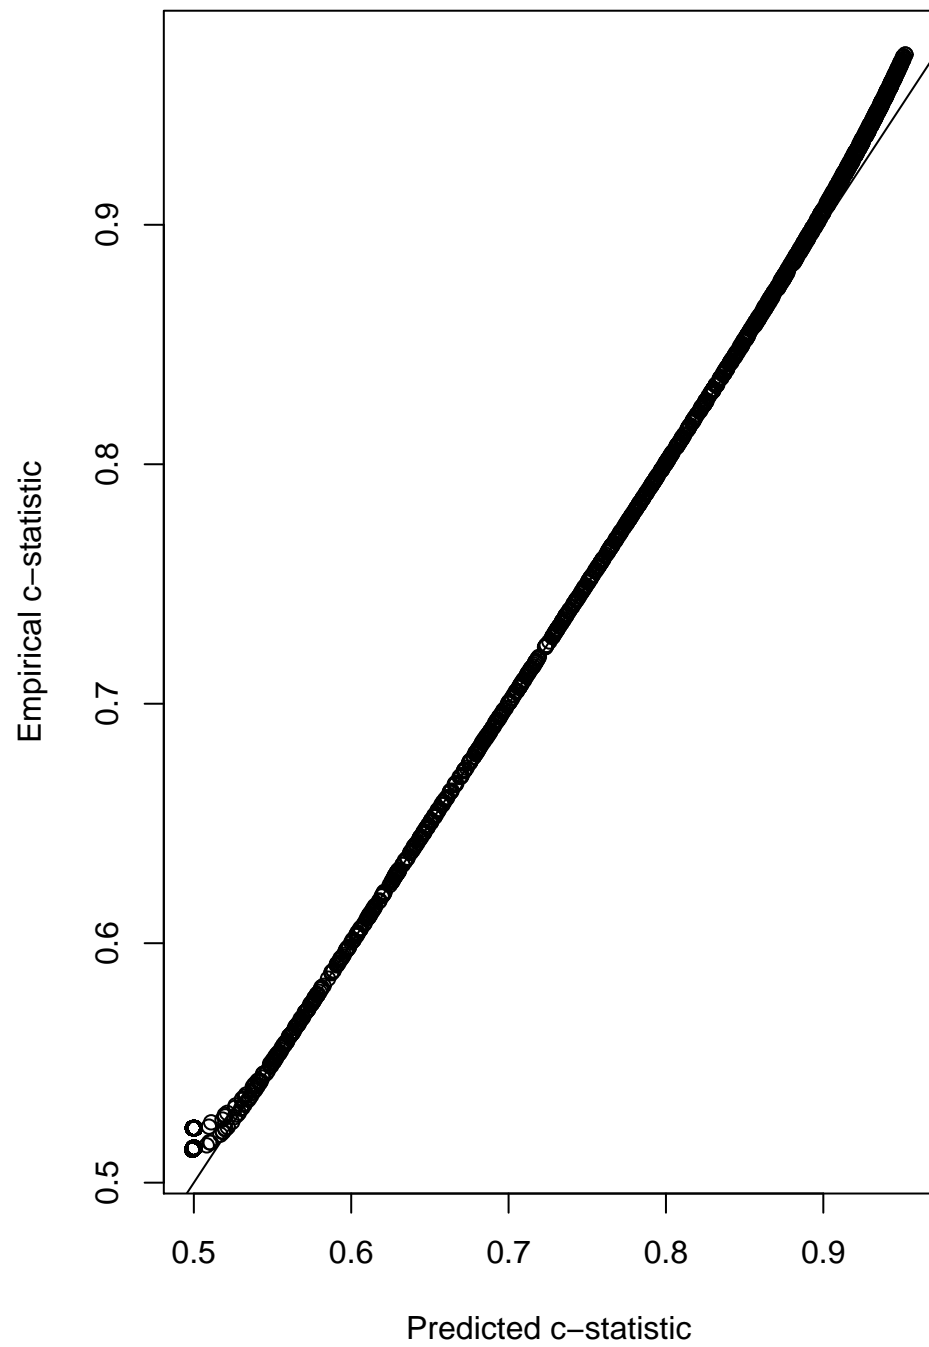

Supplement: MOESM1 [file 9432934]
